# Supplementary material for: Prognostic value of systemic inflammatory markers for oral cancer patients based on the 8th edition of AJCC staging system
Source: PubMed Central journal article supplement (PMC7374730; doi:10.1038/s41598-020-68991-3), 2020-07-21
Supplement: 41598_2020_68991_MOESM1_ESM.pdf [file 41598_2020_68991_MOESM1_ESM.pdf]

## Supplementary Information

Article in *Scientific Reports*

### Prognostic value of systemic inflammatory markers for oral cancer patients based on the 8th edition of AJCC staging system

Sanghoon Lee, Dong Wook Kim, Sunmo Kwon, Hyung Jun Kim, In-Ho Cha, Woong Nam

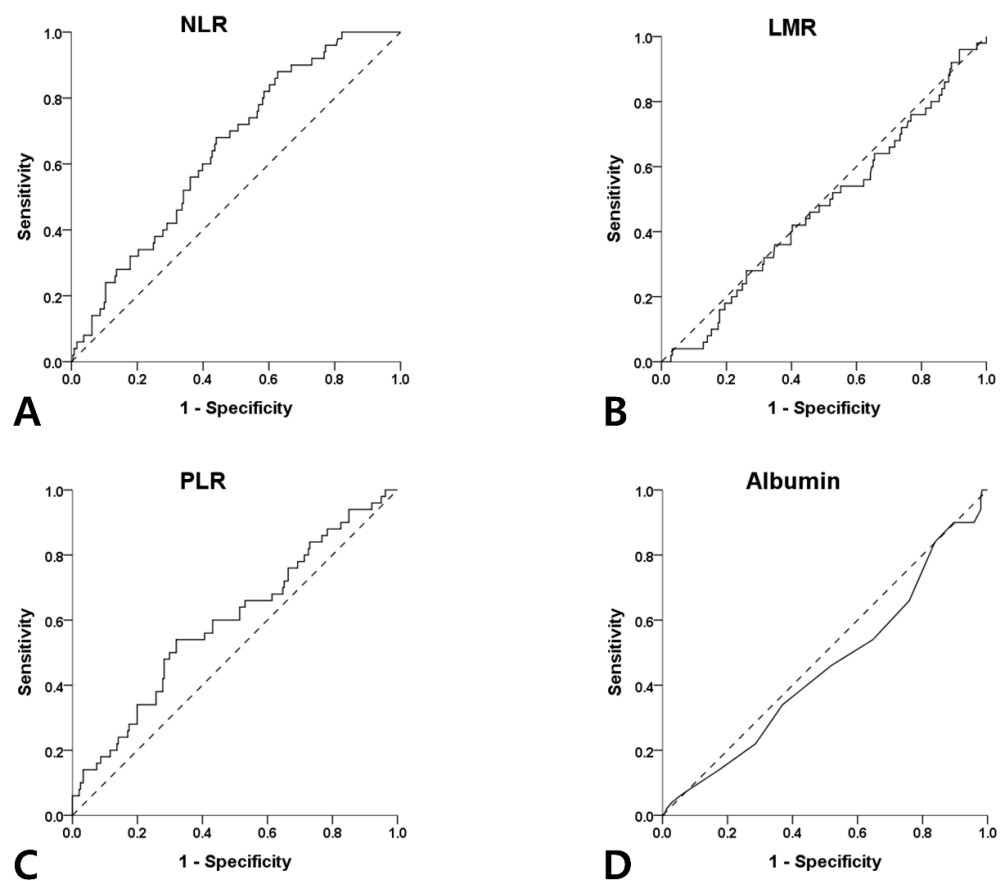

**Supplementary Figure S1.** Receiver operating characteristic curves for determining optimal cut-off value of the preoperative systemic inflammatory markers for overall survival: (A) neutrophil-lymphocyte ratio (AUC = 0.640,  $P < 0.01$ ); (B) lymphocyte-monocyte ratio (AUC = 0.482,  $P = 0.689$ ); (C) platelet-lymphocyte ratio (AUC = 0.595,  $P = 0.033$ ); (D) Albumin (AUC = 0.454,  $P = 0.307$ )

**Supplementary Table S1.** Receiver operating characteristic curve analysis for overall survival

| <b>Parameter</b>                     | <b>NLR</b> | <b>LMR</b> | <b>PLR</b> | <b>Albumin</b> |
|--------------------------------------|------------|------------|------------|----------------|
| AUC                                  | 0.640      | 0.482      | 0.595      | 0.454          |
| 95% CI                               | 0.56-0.72  | 0.40-0.57  | 0.51-0.68  | 0.37-0.54      |
| Optimal sensitivity (%)              | 58.8       | 49.0       | 56.9       | 46.0           |
| Optimal specificity (%)              | 60.3       | 51.7       | 59.5       | 51.9           |
| Cut-off value at optimal sensitivity | 2.23       | 4.65       | 135.14     | 4.35           |
| p-value                              | 0.002*     | 0.689      | 0.033*     | 0.307          |

Abbreviation: NLR, neutrophil-lymphocyte ratio; LMR, lymphocyte-monocyte ratio; PLR, platelet-lymphocyte ratio; AUC, area under the curve; CI, confidence interval

\* Statistically significant

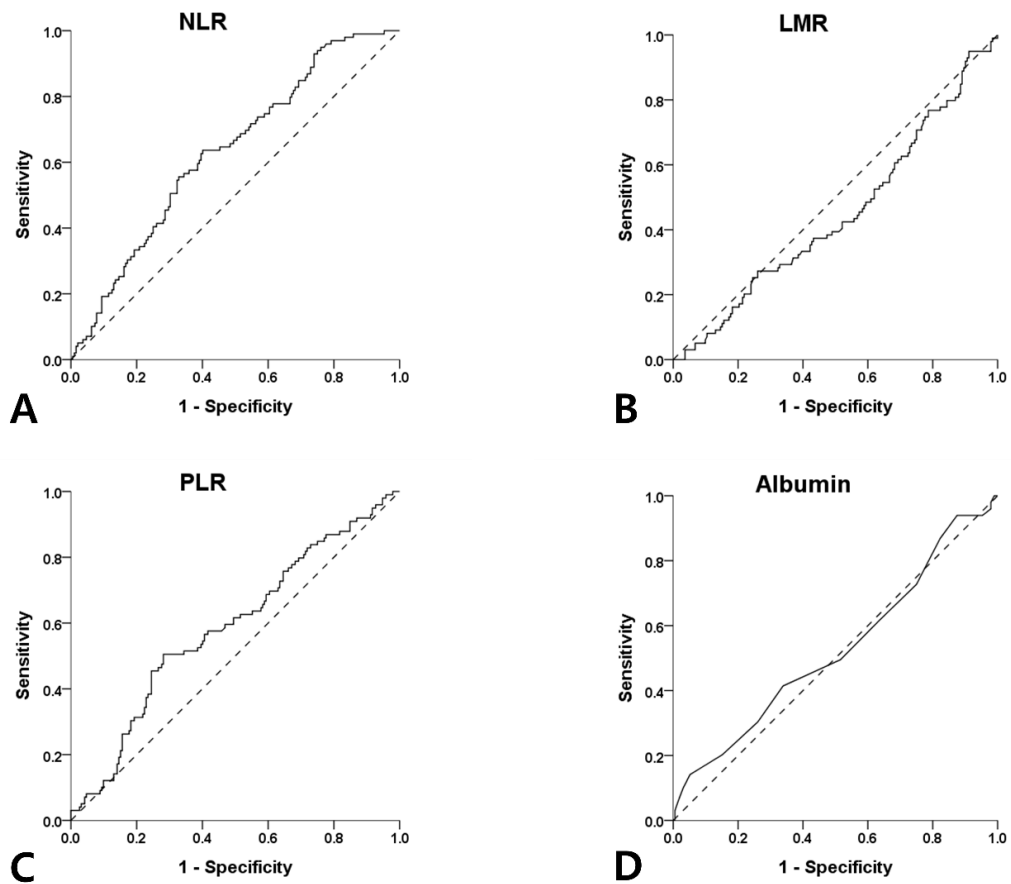

**Supplementary Figure S2.** Receiver operating characteristic curves for determining optimal cut-off value of the preoperative systemic inflammatory markers for disease-free survival: (A) neutrophil-lymphocyte ratio (AUC = 0.630,  $P < 0.01$ ); (B) lymphocyte-monocyte ratio (AUC = 0.450,  $P = 0.163$ ); (C) platelet-lymphocyte ratio (AUC = 0.588,  $P = 0.014$ ); (D) Albumin (AUC = 0.525,  $P = 0.484$ )

**Supplementary Table S2.** Receiver operating characteristic curve analysis for disease-free survival

| <b>Parameter</b>                     | <b>NLR</b> | <b>LMR</b> | <b>PLR</b> | <b>Albumin</b> |
|--------------------------------------|------------|------------|------------|----------------|
| AUC                                  | 0.630      | 0.450      | 0.588      | 0.525          |
| 95% CI                               | 0.56-0.70  | 0.38-0.52  | 0.52-0.66  | 0.45-0.60      |
| Optimal sensitivity (%)              | 62.0       | 44.0       | 58.0       | 57.6           |
| Optimal specificity (%)              | 60.1       | 44.6       | 58.0       | 42.2           |
| Cut-off value at optimal sensitivity | 2.16       | 4.45       | 130.32     | 4.35           |
| p-value                              | <0.001*    | 0.163      | 0.014*     | 0.484          |

Abbreviation: NLR, neutrophil-lymphocyte ratio; LMR, lymphocyte-monocyte ratio; PLR, platelet-lymphocyte ratio; AUC, area under the curve; CI, confidence interval

\* Statistically significant
